# Supplementary material for: Underweight Is Associated with a Higher Risk of Acute Pancreatitis in Type 2 Diabetes: A Nationwide Cohort Study
Source: MDPI journal article supplement (doi:10.3390/jcm11195641), 2022-09-25
Supplement: s1 [file s1]

**Supplementary Table S1. Adjusted hazard ratios of acute pancreatitis by BMI group according to the presence or absence of type 2 diabetes.**

| Diabetic Status | BMI (kg/m <sup>2</sup> ) | Subjects | Acute pancreatitis | Non-adjusted HR     | Age- and sex-adjusted HR | *Adjusted HR (95% CI) |
|-----------------|--------------------------|----------|--------------------|---------------------|--------------------------|-----------------------|
| Total           | < 18.5                   | 145362   | 348                | 1.158 (1.036–1.293) | 1.407 (1.259–1.571)      | 1.412 (1.264–1.577)   |
|                 | < 23                     | 1527723  | 3223               | 1 (Reference)       | 1 (Reference)            | 1 (Reference)         |
|                 | < 25                     | 962488   | 2049               | 1.005 (0.951–1.063) | 0.861 (0.815–0.91)       | 0.839 (0.793–0.888)   |
|                 | < 30                     | 1137786  | 2897               | 1.202 (1.143–1.264) | 1.009 (0.959–1.061)      | 0.927 (0.881–0.975)   |
|                 | ≥ 30                     | 139137   | 416                | 1.416 (1.278–1.568) | 1.377 (1.244–1.526)      | 1.129 (1.017–1.253)   |
| Non-diabetes    | < 18.5                   | 140516   | 304                | 1.151 (1.023–1.296) | 1.394 (1.238–1.569)      | 1.38 (1.226–1.554)    |
|                 | < 23                     | 1442781  | 2760               | 1 (Reference)       | 1 (Reference)            | 1 (Reference)         |
|                 | < 25                     | 875337   | 1688               | 1.004 (0.945–1.067) | 0.864 (0.813–0.918)      | 0.857 (0.806–0.911)   |
|                 | < 30                     | 997282   | 2273               | 1.187 (1.123–1.255) | 1.001 (0.947–1.059)      | 0.956 (0.903–1.012)   |
|                 | ≥ 30                     | 114760   | 309                | 1.406 (1.25–1.582)  | 1.382 (1.229–1.555)      | 1.22 (1.082–1.375)    |
| Diabetes        | < 18.5                   | 4846     | 44                 | 1.886 (1.384–2.569) | 1.874 (1.376–2.553)      | 1.849 (1.356–2.521)   |
|                 | < 23                     | 84942    | 463                | 1 (Reference)       | 1 (Reference)            | 1 (Reference)         |
|                 | < 25                     | 87151    | 361                | 0.741 (0.645–0.85)  | 0.735 (0.64–0.843)       | 0.725 (0.63–0.834)    |
|                 | < 30                     | 140504   | 624                | 0.785 (0.696–0.886) | 0.801 (0.71–0.904)       | 0.77 (0.681–0.871)    |
|                 | ≥ 30                     | 24377    | 107                | 0.773 (0.626–0.954) | 0.882 (0.714–1.091)      | 0.805 (0.65–0.997)    |

\*Adjusted hazard ratio for age, sex, alcohol consumption, smoking, type 2 diabetes, insulin administration, hypertension, dyslipidemia, chronic kidney disease, chronic pancreatitis, regular physical activity, and low income

Abbreviations: BMI, body mass index; HR, hazard ratio; CI, confidence interval

**Supplementary Table S2. Incidence rates and hazard ratios of acute pancreatitis according to glycemic status and BMI category**

| Glycemic status           | BMI (kg/m <sup>2</sup> ) | Subjects | Acute Pancreatitis | Duration (person-years) | IR   | Hazard ratios (95% confidence interval) |                     |                     |
|---------------------------|--------------------------|----------|--------------------|-------------------------|------|-----------------------------------------|---------------------|---------------------|
|                           |                          |          |                    |                         |      | Model 1                                 | Model 2             | Model 3             |
| Normal FPG                | < 18.5                   | 121122   | 233                | 984865                  | 0.24 | 1.155 (1.008–1.323)                     | 1.396 (1.219–1.6)   | 1.385 (1.209-1.587) |
|                           | < 23                     | 1160837  | 1963               | 9568228                 | 0.21 | 1 (reference)                           | 1 (reference)       | 1 (reference)       |
|                           | < 25                     | 644010   | 1098               | 5322932                 | 0.21 | 1.005 (0.933–1.082)                     | 0.865 (0.803–0.932) | 0.859 (0.798-0.925) |
|                           | < 30                     | 680830   | 1450               | 5626063                 | 0.26 | 1.256 (1.173–1.344)                     | 1.059 (0.989–1.133) | 1.015 (0.948-1.087) |
|                           | ≥ 30                     | 73055    | 177                | 603193                  | 0.29 | 1.431 (1.227–1.668)                     | 1.389 (1.191–1.62)  | 1.24 (1.061-1.449)  |
| Impaired fasting glucose  | < 18.5                   | 19394    | 71                 | 152297                  | 0.47 | 2.28 (1.799–2.889)                      | 1.94 (1.531–2.459)  | 1.782 (1.406-2.259) |
|                           | < 23                     | 281944   | 797                | 2297950                 | 0.35 | 1.692 (1.558–1.837)                     | 1.352 (1.244–1.468) | 1.279 (1.177-1.39)  |
|                           | < 25                     | 231327   | 590                | 1899166                 | 0.31 | 1.514 (1.381–1.66)                      | 1.127 (1.027–1.236) | 1.066 (0.972-1.169) |
|                           | < 30                     | 316452   | 823                | 2601091                 | 0.32 | 1.542 (1.422–1.673)                     | 1.158 (1.067–1.257) | 1.062 (0.977-1.154) |
|                           | ≥ 30                     | 41705    | 132                | 342509                  | 0.39 | 1.88 (1.577–2.243)                      | 1.649 (1.382–1.966) | 1.413 (1.183-1.688) |
| New onset type 2 diabetes | < 18.5                   | 2125     | 13                 | 15160                   | 0.86 | 4.219 (2.445–7.278)                     | 2.737 (1.586–4.725) | 2.225 (1.289-3.841) |
|                           | < 23                     | 29619    | 153                | 234388                  | 0.65 | 3.191 (2.707–3.761)                     | 2.185 (1.852–2.578) | 1.889 (1.601-2.229) |
|                           | < 25                     | 28612    | 81                 | 231155                  | 0.35 | 1.711 (1.37–2.137)                      | 1.152 (0.922–1.44)  | 1.013 (0.81-1.267)  |
|                           | < 30                     | 47853    | 172                | 388821                  | 0.44 | 2.16 (1.848–2.524)                      | 1.516 (1.296–1.772) | 1.31 (1.119-1.534)  |
|                           | ≥ 30                     | 8597     | 37                 | 70119                   | 0.53 | 2.578 (1.862–3.569)                     | 2.171 (1.568–3.005) | 1.759 (1.269-2.438) |
| Type 2 diabetes < 5 years | < 18.5                   | 1251     | 15                 | 8423                    | 1.78 | 8.791 (5.294–14.599)                    | 5.14 (3.091–8.547)  | 4.122 (2.478-6.857) |
|                           | < 23                     | 24950    | 155                | 194327                  | 0.80 | 3.892 (3.305–4.584)                     | 2.347 (1.99–2.767)  | 2.046 (1.734-2.414) |
|                           | < 25                     | 28756    | 129                | 230400                  | 0.56 | 2.727 (2.282–3.259)                     | 1.653 (1.382–1.978) | 1.453 (1.213-1.74)  |
|                           | < 30                     | 50986    | 234                | 413100                  | 0.57 | 2.757 (2.407–3.157)                     | 1.741 (1.519–1.996) | 1.499 (1.304-1.723) |
|                           | ≥ 30                     | 9692     | 45                 | 78879                   | 0.57 | 2.777 (2.066–3.732)                     | 2.072 (1.542–2.785) | 1.691 (1.256-2.277) |
| Type 2 diabetes ≥ 5 years | < 18.5                   | 1470     | 16                 | 9793                    | 1.63 | 8.074 (4.937–13.204)                    | 4.487 (2.741–7.344) | 3.863 (2.359-6.326) |
|                           | < 23                     | 30373    | 155                | 231707                  | 0.67 | 3.273 (2.78–3.855)                      | 1.856 (1.574–2.19)  | 1.67 (1.414-1.972)  |
|                           | < 25                     | 29783    | 151                | 233187                  | 0.65 | 3.163 (2.68–3.732)                      | 1.78 (1.506–2.104)  | 1.556 (1.314-1.843) |
|                           | < 30                     | 41665    | 218                | 330621                  | 0.66 | 3.218 (2.797–3.701)                     | 1.882 (1.633–2.168) | 1.654 (1.431-1.912) |

|           |      |    |       |      |                     |                     |                     |
|-----------|------|----|-------|------|---------------------|---------------------|---------------------|
| $\geq 30$ | 6088 | 25 | 48339 | 0.52 | 2.525 (1.702–3.746) | 1.703 (1.147–2.527) | 1.425 (0.959-2.117) |
|-----------|------|----|-------|------|---------------------|---------------------|---------------------|

Abbreviations: BMI, body mass index; IR, incidence rate (per 1000 person-years); FPG, fasting plasma glucose

**Supplementary Table S3. Adjusted hazard ratios of acute pancreatitis in subjects with constant BMI**

| <b>Diabetic Status</b> | <b>BMI (kg/m<sup>2</sup>)</b> | <b>Subjects</b> | <b>Acute pancreatitis</b> | <b>Adjusted HR (95% CI)</b> |
|------------------------|-------------------------------|-----------------|---------------------------|-----------------------------|
| Total                  | < 18.5                        | 41917           | 72                        | 1.643 (1.289-2.094)         |
|                        | < 23                          | 529269          | 748                       | 1 (Reference)               |
|                        | < 25                          | 251381          | 368                       | 0.84 (0.741-0.952)          |
|                        | < 30                          | 362505          | 696                       | 1.037 (0.933-1.153)         |
|                        | ≥ 30                          | 39820           | 91                        | 1.317 (1.056-1.643)         |
| Non-diabetes           | < 18.5                        | 41217           | 68                        | 1.687 (1.313-2.167)         |
|                        | < 23                          | 513302          | 675                       | 1 (Reference)               |
|                        | < 25                          | 237932          | 334                       | 0.875 (0.767-0.999)         |
|                        | < 30                          | 334921          | 614                       | 1.089 (0.974-1.218)         |
|                        | ≥ 30                          | 35107           | 71                        | 1.328 (1.037-1.701)         |
| Diabetes               | < 18.5                        | 700             | 4                         | 1.332 (0.486-3.651)         |
|                        | < 23                          | 15967           | 73                        | 1 (Reference)               |
|                        | < 25                          | 13449           | 34                        | 0.55 (0.366-0.827)          |
|                        | < 30                          | 27584           | 82                        | 0.646 (0.469-0.89)          |
|                        | ≥ 30                          | 4713            | 20                        | 0.937 (0.562-1.562)         |

Adjusted hazard ratio for age, sex, alcohol consumption, smoking, type 2 diabetes, insulin administration, hypertension, dyslipidemia, chronic kidney disease, chronic pancreatitis, regular physical activity, and low income

Abbreviations: BMI, body mass index; HR, hazard ratio; CI, confidence interval
